# Supplementary material for: Association between Plasma Trimethylamine N-Oxide Levels and Type 2 Diabetes: A Case Control Study
Source: MDPI journal article supplement (doi:10.3390/nu14102093), 2022-05-17
Supplement: s1 [file s1]

## Supplementary Material

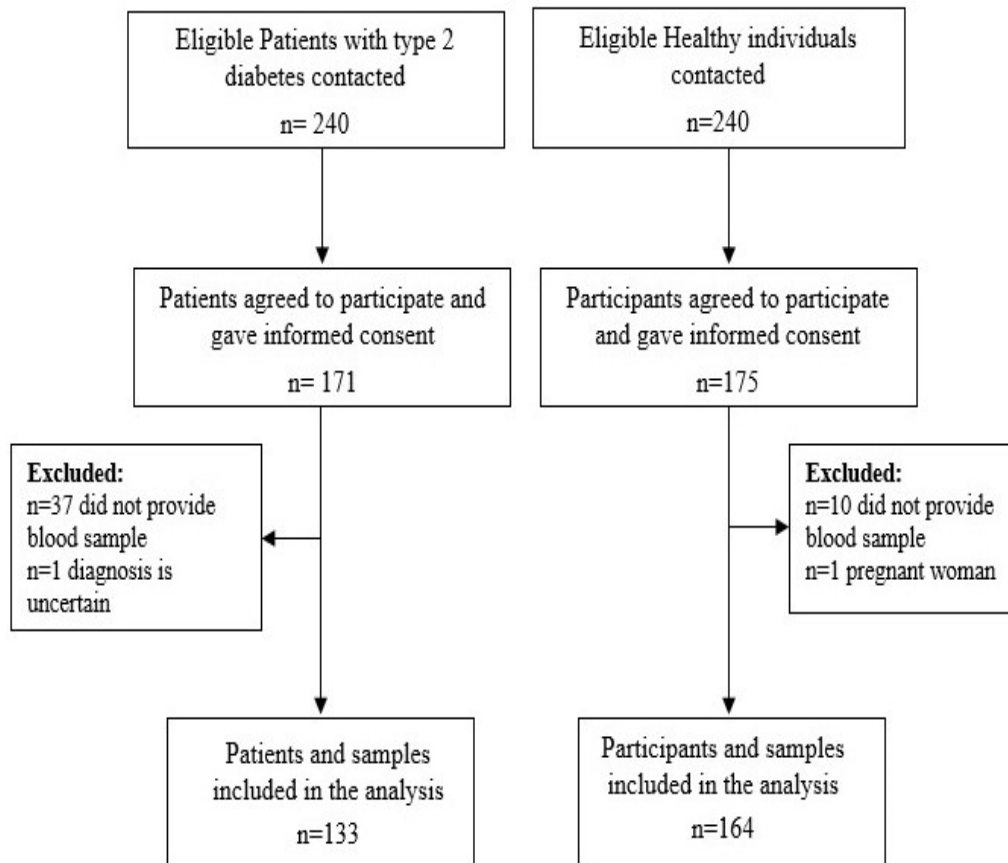

**Figure S1.** Flowchart of study participants screening and quantification.

### a) TMAO

#### MS

TMAO MS 01 1 (0.167)

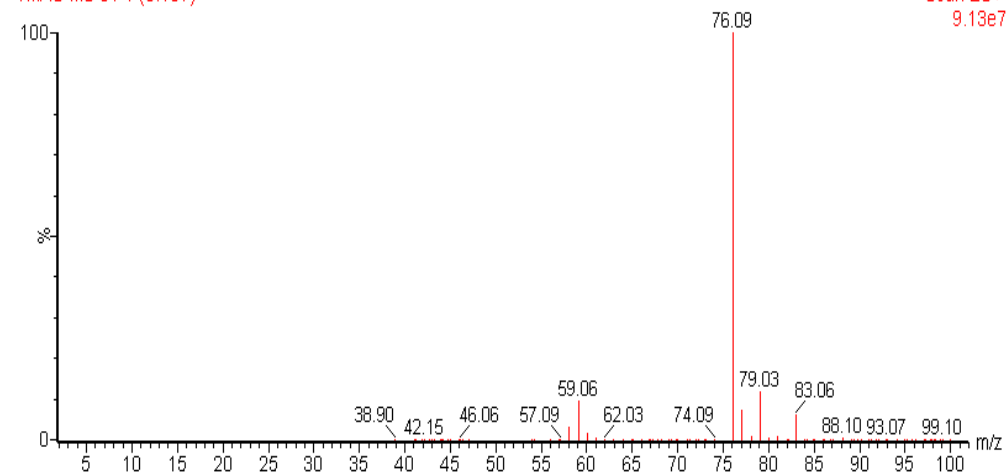

### b) d9 (TMAO)

#### MS/MS

TMAO 02 1 (0.167)

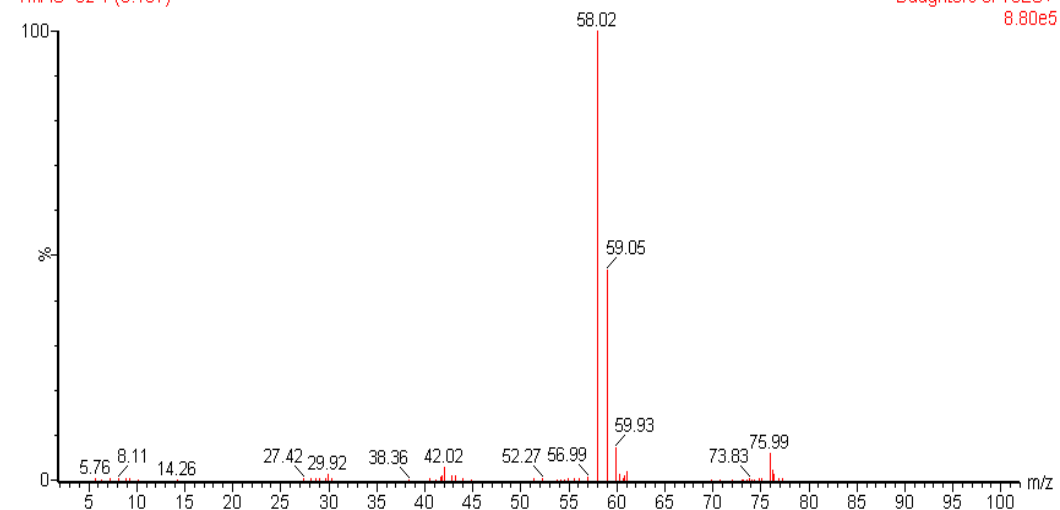

**Figure S2.** Tandem mass spectrometry spectrum of extracted positive ion from trimethylamine *N*-oxide (TMAO) and deuterated stable isotope (d9-TMAO)

**Table S1.** Summary of consumption frequencies of different food items among healthy controls and type 2 diabetes cases

|                                     | Type 2 diabetes |                 | <i>P</i> -value <sup>c</sup> |
|-------------------------------------|-----------------|-----------------|------------------------------|
|                                     | No<br>(n= 164)  | Yes<br>(n= 133) |                              |
| <i>Food Categories</i> <sup>a</sup> |                 |                 |                              |
| <b>Meats</b>                        |                 |                 |                              |
| Meat Kabsa*                         | 78 (47.5)       | 84 (63.1)       | 0.023                        |
| Meat stew*                          | 47 (28.6)       | 71 (53.4)       | <0.001                       |
| Meat kabab                          | 17 (10.4)       | 21 (15.8)       | NS                           |
| Grilled meat                        | 20 (12.2)       | 23 (17.3)       | NS                           |
| Chicken Kabsa*                      | 106 (64.6)      | 103 (77.4)      | NS                           |
| Chicken stew*                       | 48 (29.3)       | 74 (55.6)       | <0.001                       |
| Grilled chicken                     | 73 (44.5)       | 93 (70)         | NS                           |
| Chicken kabab                       | 13 (7.9)        | 25 (18.8)       | 0.035                        |
| Fried Chicken                       | 26 (15.8)       | 16 (12)         | NS                           |
| Camel Meat                          | 12 (7.3)        | 34 (25.5)       | <0.001                       |
| Fried fish                          | 21 (12.8)       | 28 (21)         | NS                           |
| Grilled fish                        | 24 (14.6)       | 30 (22.5)       | NS                           |
| Shrimp                              | 19 (11.6)       | 15 (11.3)       | NS                           |
| Canned tuna                         | 40 (24.4)       | 34 (25.5)       | NS                           |
| Liver                               | 6 (3.7)         | 9 (6.8)         | NS                           |
| <b>Breads And Cereals</b>           |                 |                 |                              |
| Wheat Bread                         | 112 (69.3)      | 104 (78.2)      | <0.001                       |
| White bread                         | 128 (78)        | 55 (41.4)       | <0.001                       |
| Multigrain bread                    | 56 (34.1)       | 55 (41.4)       | NS                           |
| White Rice                          | 128 (78)        | 110 (82.7)      | <0.10                        |
| Pasta                               | 78 (47.6)       | 67 (50.4)       | NS                           |
| cereals                             | 29 (17.7)       | 15 (11.3)       | NS                           |
| Boiled potatoes                     | 30 (18.3)       | 56 (42.1)       | <0.001                       |
| Fried potatoes                      | 66 (40.2)       | 36 (27.1)       | <0.001                       |
| <b>Sandwiches And Burgers</b>       |                 |                 |                              |
| Falafel Sandwich                    | 25 (15.2)       | 25 (18.8)       | NS                           |
| Shawerma Sandwich                   | 43 (26.2)       | 24 (18)         | <0.001                       |
| Beef Burger                         | 34 (20.7)       | 9 (6.8)         | <0.001                       |
| Chicken Burger                      | 32 (19.5)       | 12 (9)          | <0.023                       |
| Fried egg sandwich                  | 63 (48.4)       | 68 (51.1)       | 0.033                        |
| Boiled egg sandwich                 | 48 (29.3)       | 83 (62.4)       | <0.001                       |
| Liver sandwich                      | 6 (3.7)         | 10 (7.5)        | NS                           |
| Beef sandwich                       | 6 (3.7)         | 11 (8.3)        | NS                           |
| <b>Eggs and Dairy Products</b>      |                 |                 |                              |
| Fried Eggs                          | 55 (33.5)       | 56 (42.1)       | NS                           |
| Boiled Eggs                         | 40 (24.4)       | 56 (42.1)       | <0.001                       |
| Cream cheese                        | 54 (32.9)       | 39 (29.3)       | 0.048                        |
| White Cheese                        | 88 (53.7)       | 80 (60.2)       | NS                           |
| Low fat cheese                      | 60 (36.6)       | 77 (57.9)       | 0.03                         |
| Full Fat Milk                       | 72 (43.9)       | 47 (35.3)       | 0.037                        |
| Low fat milk                        | 38 (23.2)       | 61 (45.9)       | <0.001                       |

|                                       |                    |                    |        |
|---------------------------------------|--------------------|--------------------|--------|
| Full fat Yogurt                       | 52 (31.7)          | 50 (37.6)          | 0.016  |
| Low fat yogurt                        | 60 (36.6)          | 74 (55.6)          | 0.01   |
| Full fat Laban*                       | 52 (31.7)          | 42 (31.6)          | NS     |
| Low fat Laban                         | 23 (14)            | 47 (35.3)          | <0.001 |
| Full fat cream                        | 20 (12.2)          | 13 (9.8)           | 0.034  |
| low fat cream                         | 12 (7.3)           | 14 (10.5)          | NS     |
| <b>Sweets And Snacks</b>              |                    |                    |        |
| Vegetable Soup                        | 81 (49.4)          | 103 (77.44)        | <0.001 |
| Sugar                                 | 70 (42.7)          | 52 (39.1)          | <0.001 |
| Nuts                                  | 76 (46.3)          | 70 (52.6)          | NS     |
| Pickles                               | 27 (16.4)          | 23 (17.3)          | NS     |
| <b>Drinks</b>                         |                    |                    |        |
| Black Tea                             | 119 (72.6)         | 106 (79.7)         | <.001  |
| Arabic Coffee                         | 135 (82.3)         | 114 (85.7)         | 0.01   |
| Fresh Juice                           | 55 (33.5)          | 67 (50.4)          | 0.026  |
| <b>Fruits</b>                         |                    |                    |        |
| Dates                                 | 131 (79.9)         | 121 (91)           | <0.001 |
| Apples                                | 82 (50)            | 97 (73)            | <0.001 |
| Pear                                  | 39 (23.8)          | 69 (51.9)          | <0.001 |
| Oranges                               | 91 (55.5)          | 107 (80.5)         | <0.002 |
| Banana                                | 94 (57.3)          | 94 (70.7)          | NS     |
| Strawberry                            | 49 (29.9)          | 34 (25.6)          | 0.03   |
| Berries                               | 25 (15.2)          | 22 (16.5)          | NS     |
| Mango                                 | 17 (10.4)          | 22 (16.5)          | NS     |
| Dried fruits                          | 34 (20.7)          | 22 (16.5)          | 0.03   |
| <b>Vegetables</b>                     |                    |                    |        |
| Salad                                 | 132 (80.5)         | 122 (91.7)         | <0.001 |
| Onion                                 | 103 (62.8)         | 115 (86.5)         | 0.03   |
| Garlic                                | 96 (58.5)          | 105 (79)           | 0.03   |
| Lentil                                | 27 (16.5)          | 65 (48.9)          | <0.001 |
| Beans                                 | 53 (32.3)          | 72 (54.1)          | 0.03   |
| Broccoli                              | 30 (18.3)          | 45 (33.8)          | 0.05   |
| Corn                                  | 40 (24.4)          | 53 (39.9)          | <0.001 |
| Pumpkin                               | 51 (31.1)          | 79 (59.4)          | <0.001 |
| Spinach                               | 25 (15.2)          | 52 (39)            | <0.001 |
| Cauliflower                           | 40 (24.4)          | 67 (50.4)          | <0.001 |
| <b>Oils and Meat Fat</b>              |                    |                    |        |
| Olive oil                             | 134 (81.7)         | 99 (74.4)          | NS     |
| Vegetable oil                         | 133 (82)           | 107 (80.5)         | NS     |
| Butter                                | 24 (14.6)          | 24 (18)            | NS     |
| Margarine                             | 11 (6.7)           | 19 (14.3)          | 0.031  |
| <b>Meat fat</b>                       |                    |                    |        |
| Eat most                              | 4 (2.4)            | 8 (6)              | NS     |
| Eat little                            | 32 (19.5)          | 11 (8.3)           | 0.019  |
| <b>Food Groups Scores<sup>b</sup></b> |                    |                    |        |
| Total Meat                            | 8.35 (5.35-14.57)) | 14.20 (8.25-19.80) | <0.001 |
| Red meat                              | 3.58 (1.35-6.05)   | 4.45 (2.25-8.90)   | 0.042  |
| White meat                            | 5.35 (3.80-10.13)  | 7.45 (3.45 -11)    | NS     |

|                     |                     |                     |        |
|---------------------|---------------------|---------------------|--------|
| Seafood             | 1 (0.45-2.45)       | 1.35 (0.45-2.35)    | NS     |
| Eggs                | 2 (1 - 4.95)        | 4 (1.90 - 8)        | <0.001 |
| Dairy Products      | 12.73 (7.23-31.83)  | 21.45 (9.85-53.40)  | 0.023  |
| Fibers <sup>#</sup> | 21.90 (12.45-37.90) | 29.50 (19.95-44.95) | 0.021  |

<sup>a</sup> Data are expressed as n (%) representing the frequency and proportion of participants who reported consuming items at least once weekly or more.

<sup>b</sup> Data are presented as median (IQR (25<sup>th</sup>-75<sup>th</sup>))

<sup>c</sup> Statistically significant association (p<0.05), NS: not statistically significant correlation (p>0.05)

\* Food recipes: Kabsa, traditional food consist of meat, rice and species; Stew: consists of cuts of meat, broth and vegetables; Laban: is a watered down yogurt

<sup>#</sup> Fibers score does not account for fibers from fruits and vegetables.
